# Supplementary material for: Zooming in and out of compact urban centers in a rapidly developed metropolis: A multi-scale investigation through isobenefit lens in Seoul
Source: Research Square preprint supplement (doi:10.21203/rs.3.rs-6942294/v1), 2025-09-22
Supplement: Supplementary file 1 [file fbef4ddf601e0b83e9050e90.docx]

**Table S1**. Types of local facility and sources of data used to investigate local service accessibility

| **Facilities** | **Examples** | **Sources** |
| --- | --- | --- |
| Libraries | Libraries | Public Data Portal, SMC Data Portal |
| Community Sport facilities | Public sport facilities (e.g. swimming pool, basketball court, baseball stadium, tennis court) | Public Data Portal, SMC Data Portal |
| Public services | Town office, community center, court | Public Data Portal, SMC Data Portal |
| Basic medical facilities | Public (community) health facilities | Public Data Portal, SMC Data Portal |
| Parks | All kinds of public park | Public Data Portal, SMC Data Portal |
| Schools | Elementary school, middle school, and high school | Public Data Portal, SMC Data Portal, National Spatial Data Infrastructure Portal |
| Public safety facilities | Police station and fire station | SMC Data Portal,  National Spatial Data Infrastructure Portal |
| Local traditional markets | Local traditional markets, dealing with essential goods and services | Map, SMC Data Portal |

**Data sources of the manuscript**

National Spatial Data Infrastructure Portal (2016) HIghschool. [Data Set].<http://data.nsdi.go.kr/dataset/14762>

National Spatial Data Infrastructure Portal. GIS data of construction/land use (2021). [Data Set]. http://data.nsdi.go.kr/dataset/12627

Public Data Portal (2020) Fire Administration_Status of City and Province Fire Stations _20200121. [Data Set].<https://www.data.go.kr/data/15048243/fileData.do>

Public Data Portal (2022) Ministry of Culture, Sports and Tourism_Status of National Public Sports Facilities. [Data Set].<https://www.data.go.kr/data/3075606/fileData.do>

Public Data Portal (2022) Ministry of Health and Welfare_Status of public health medical institutions. [Data Set].<https://www.data.go.kr/data/15004305/fileData.do>

Public Data Portal (2022) City Park information. [Data Set].<https://www.data.go.kr/data/15012890/standard.do>

Public Data Portal (2022) National library information. [Data Set].<https://www.data.go.kr/data/15013109/standard.do>

Public Data Portal (2022) National Police Agency_Police Office Location. [Data Set].<https://www.data.go.kr/data/15054711/fileData.do>

Public Data Portal (2021) Seoul Metropolitan Office of Education_Status information for schools in Seoul. [Data Set].<https://www.data.go.kr/data/3070110/fileData.do>

SMC Data (2021) Major Parks in Seoul. [Data Set].<https://data.seoul.go.kr/dataList/OA-394/S/1/datasetView.do>

SMC Data (2021.05) Public health centers and branch offices in Seoul. [Data Set].<https://data.seoul.go.kr/dataList/10151/S/2/datasetView.do>

SMC Data (2021.09) Statistics on libraries in Seoul. [Data Set].<https://data.seoul.go.kr/dataList/387/S/2/datasetView.do>

SMC Data (2022.04) Seoul city planning facilities (public, cultural and sports facilities) location information (coordinate system: ITRF2000). [Data Set].<https://data.seoul.go.kr/dataList/OA-20961/F/1/datasetView.do>

SMC Data (2022.08) Seoul Public Sport Facilities. [Data Set].<https://data.seoul.go.kr/dataList/OA-1115/F/1/datasetView.do>

SMC Data (2022) Seoul Market place. [Data Set].<https://data.seoul.go.kr/dataList/OA-1176/S/1/datasetView.do>

SMC webpage (2023) Local Market status. [Data Set].<https://news.seoul.go.kr/economy/archives/86912>

Seoul Transport Operation and Information Service (2019) Origin and Destination data of public transport. [Data Set].https://topis.seoul.go.kr/refRoom/openRefRoom_3_4.do

Public Data Portal (2021) [National Railroad Authority Airport Railroad Distance between stations.](https://www.data.go.kr/en/data/15041460/fileData.do) [Data Set].https://www.data.go.kr/data/15041310/fileData.do

Public Data Portal (2021) [National Railroad Authority](https://www.data.go.kr/en/data/15041460/fileData.do) [Bundang Line](https://www.data.go.kr/en/data/15041510/fileData.do) [Distance between stations.](https://www.data.go.kr/en/data/15041460/fileData.do) [Data Set].<https://www.data.go.kr/data/15041284/fileData.do>

Public Data Portal (2021) [National Railroad Authority](https://www.data.go.kr/en/data/15041269/fileData.do) [Everline](https://www.data.go.kr/en/data/15041075/fileData.do) [Distance between stations.](https://www.data.go.kr/en/data/15041269/fileData.do) [Data Set].<https://www.data.go.kr/data/15081850/fileData.do>

Public Data Portal (2021) [National Railroad Authority Seoul Metropolitan Area Line 1 Distance between stations.](https://www.data.go.kr/en/data/15041460/fileData.do) https://www.data.go.kr/data/15041460/fileData.do

Public Data Portal (2021) [National Railroad Authority Seoul Metropolitan Area Line 2 Distance between stations.](https://www.data.go.kr/en/data/15041460/fileData.do) [https://www.data.go.kr/data/15041425/fileData.do](https://www.data.go.kr/en/data/15041425/fileData.do)

Public Data Portal (2021) [National Railroad Authority Seoul Metropolitan Area Line 3 Distance between stations.](https://www.data.go.kr/en/data/15041460/fileData.do) [https://www.data.go.kr/data/15041423/fileData.do](https://www.data.go.kr/en/data/15041423/fileData.do)

Public Data Portal (2021) [National Railroad Authority Seoul Metropolitan Area Line 4 Distance between stations.](https://www.data.go.kr/en/data/15041460/fileData.do) https://www.data.go.kr/data/15041350/fileData.do

Public Data Portal (2021) [National Railroad Authority Seoul Metropolitan Area Line 5 Distance between stations.](https://www.data.go.kr/en/data/15041460/fileData.do) https://www.data.go.kr/data/15041348/fileData.do?recommendDataYn=Y

Public Data Portal (2021) [National Railroad Authority Seoul Metropolitan Area Line 6 Distance between stations.](https://www.data.go.kr/en/data/15041460/fileData.do) https://www.data.go.kr/data/15041297/fileData.do

Public Data Portal (2021) [National Railroad Authority Seoul Metropolitan Area Line 7 Distance between stations.](https://www.data.go.kr/en/data/15041460/fileData.do) https://www.data.go.kr/data/15041340/fileData.do

Public Data Portal (2021) [National Railroad Authority Seoul Metropolitan Area Line 8 Distance between stations.](https://www.data.go.kr/en/data/15041460/fileData.do) https://www.data.go.kr/data/15041299/fileData.do?recommendDataYn=Y

Public Data Portal (2021) [National Railroad Authority Seoul Metropolitan Area Line 9 Distance between stations.](https://www.data.go.kr/en/data/15041460/fileData.do) [https://www.data.go.kr/data/15041298/fileData.do](https://www.data.go.kr/en/data/15041298/fileData.do)

Public Data Portal (2021) [National Railroad Authority](https://www.data.go.kr/en/data/15041460/fileData.do) Shinb[undang Line](https://www.data.go.kr/en/data/15041510/fileData.do) [Distance between stations.](https://www.data.go.kr/en/data/15041460/fileData.do) https://www.data.go.kr/data/15041074/fileData.do

Public Data Portal (2021) [National Railroad Authority Suin Line Distance between stations.](https://www.data.go.kr/en/data/15041269/fileData.do) [Data Set].https://www.data.go.kr/data/15041269/fileData.do

Public Data Portal (2021) [National Railroad Authority Gyeongchun Line Distance between stations.](https://www.data.go.kr/en/data/15041269/fileData.do) [Data Set].[https://www.data.go.kr/data/15041295/fileData.do](https://www.data.go.kr/en/data/15041295/fileData.do)

Public Data Portal (2021) [National Railroad Authority](https://www.data.go.kr/en/data/15041269/fileData.do) [Gyeonggang Line](https://www.data.go.kr/en/data/15041296/fileData.do) [Distance between stations.](https://www.data.go.kr/en/data/15041269/fileData.do) [Data Set].https://www.data.go.kr/data/15041296/fileData.do

Public Data Portal (2021) [National Railroad Authority](https://www.data.go.kr/en/data/15041269/fileData.do) [Gyeongui Jungang Line](https://www.data.go.kr/en/data/15041327/fileData.do) [Distance between stations.](https://www.data.go.kr/en/data/15041269/fileData.do) [Data Set].[https://www.data.go.kr/data/15041327/fileData.do](https://www.data.go.kr/en/data/15041327/fileData.do)

Public Data Portal (2021) [National Railroad Authority](https://www.data.go.kr/en/data/15041269/fileData.do) Incheon Line 1 [Distance between stations.](https://www.data.go.kr/en/data/15041269/fileData.do) [Data Set].<https://www.data.go.kr/data/15081855/fileData.do?recommendDataYn=Y>

Public Data Portal (2021) [National Railroad Authority](https://www.data.go.kr/en/data/15041269/fileData.do) Incheon Line 2 [Distance between stations.](https://www.data.go.kr/en/data/15041269/fileData.do) [Data Set]. https://www.data.go.kr/data/15081856/fileData.do?recommendDataYn=Y

Public Data Portal (2021) [National Railroad Authority](https://www.data.go.kr/en/data/15041269/fileData.do) [Uijeongbu Light Railroad](https://www.data.go.kr/en/data/15081852/fileData.do) [Distance between stations.](https://www.data.go.kr/en/data/15041269/fileData.do) [Data Set].[https://www.data.go.kr/data/15081852/fileData.do](https://www.data.go.kr/en/data/15081852/fileData.do)

Public Data Portal (2021) [National Railroad Authority](https://www.data.go.kr/en/data/15041269/fileData.do) UiTrans [Distance between stations.](https://www.data.go.kr/en/data/15041269/fileData.do) [Data Set].https://www.data.go.kr/data/15081853/fileData.do

Railway Industry Information Center of Korea (2022)

<http://www.kric.go.kr>
